# Supplementary material for: PredNTS: Improved and Robust Prediction of Nitrotyrosine Sites by Integrating Multiple Sequence Features
Source: PubMed Central journal article supplement (PMC7962192; doi:10.3390/ijms22052704), 2021-03-08
Supplement: ijms-22-02704-s001.pdf [file ijms-22-02704-s001.pdf]

## Supplementary Information

### PredNTS: Improved and Robust Prediction of Nitrotyrosine Sites by Integrating Multiple Sequence Features

Andi Nur Nilamyani, Firda Nurul Auliah, Mohammad Ali Moni, Watshara Shoombuatong, Md Mehedi Hasan, and Hiroyuki Kurata

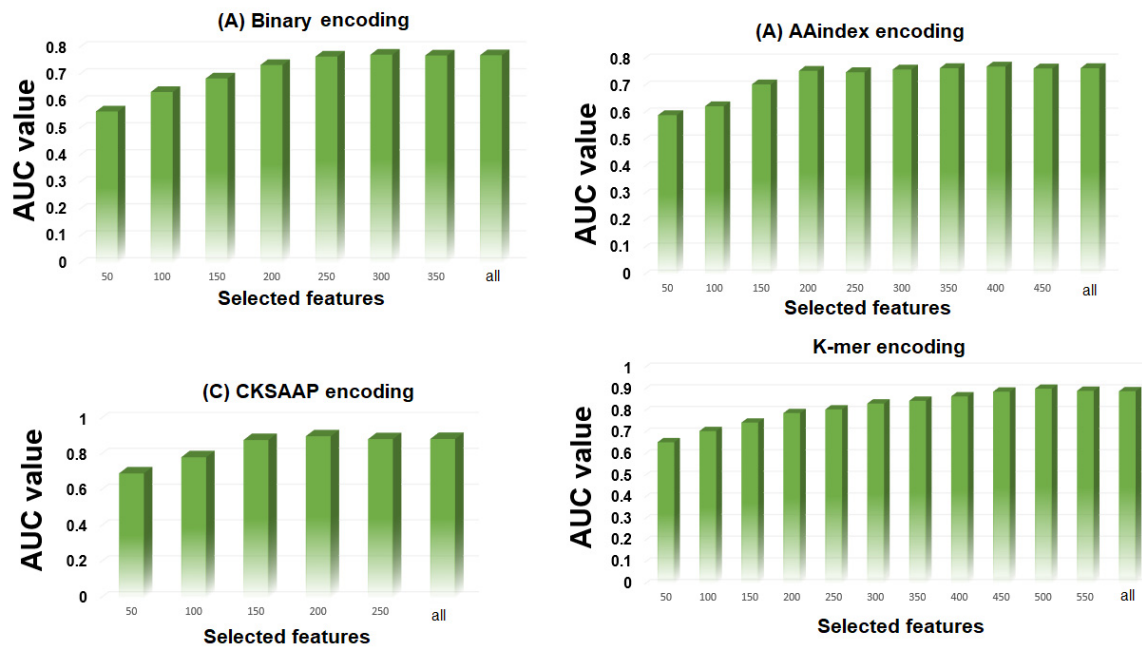

Figure S1. AUC value with respect to selected features by RFE for the four encoding schemes.
